# Supplementary material for: Safer Wards: reducing violence on older people's mental health wards
Source: PubMed Central journal article supplement — BMJ Qual Improv Rep. 2015 Jun 9;4(1):u207447.w2977. doi: 10.1136/bmjquality.u207447.w2977 (PMC4645881; doi:10.1136/bmjquality.u207447.w2977), 2015-06-09

# Pareto curve - number of incidents of physical violence by ward

(April 2013 - March 2014)

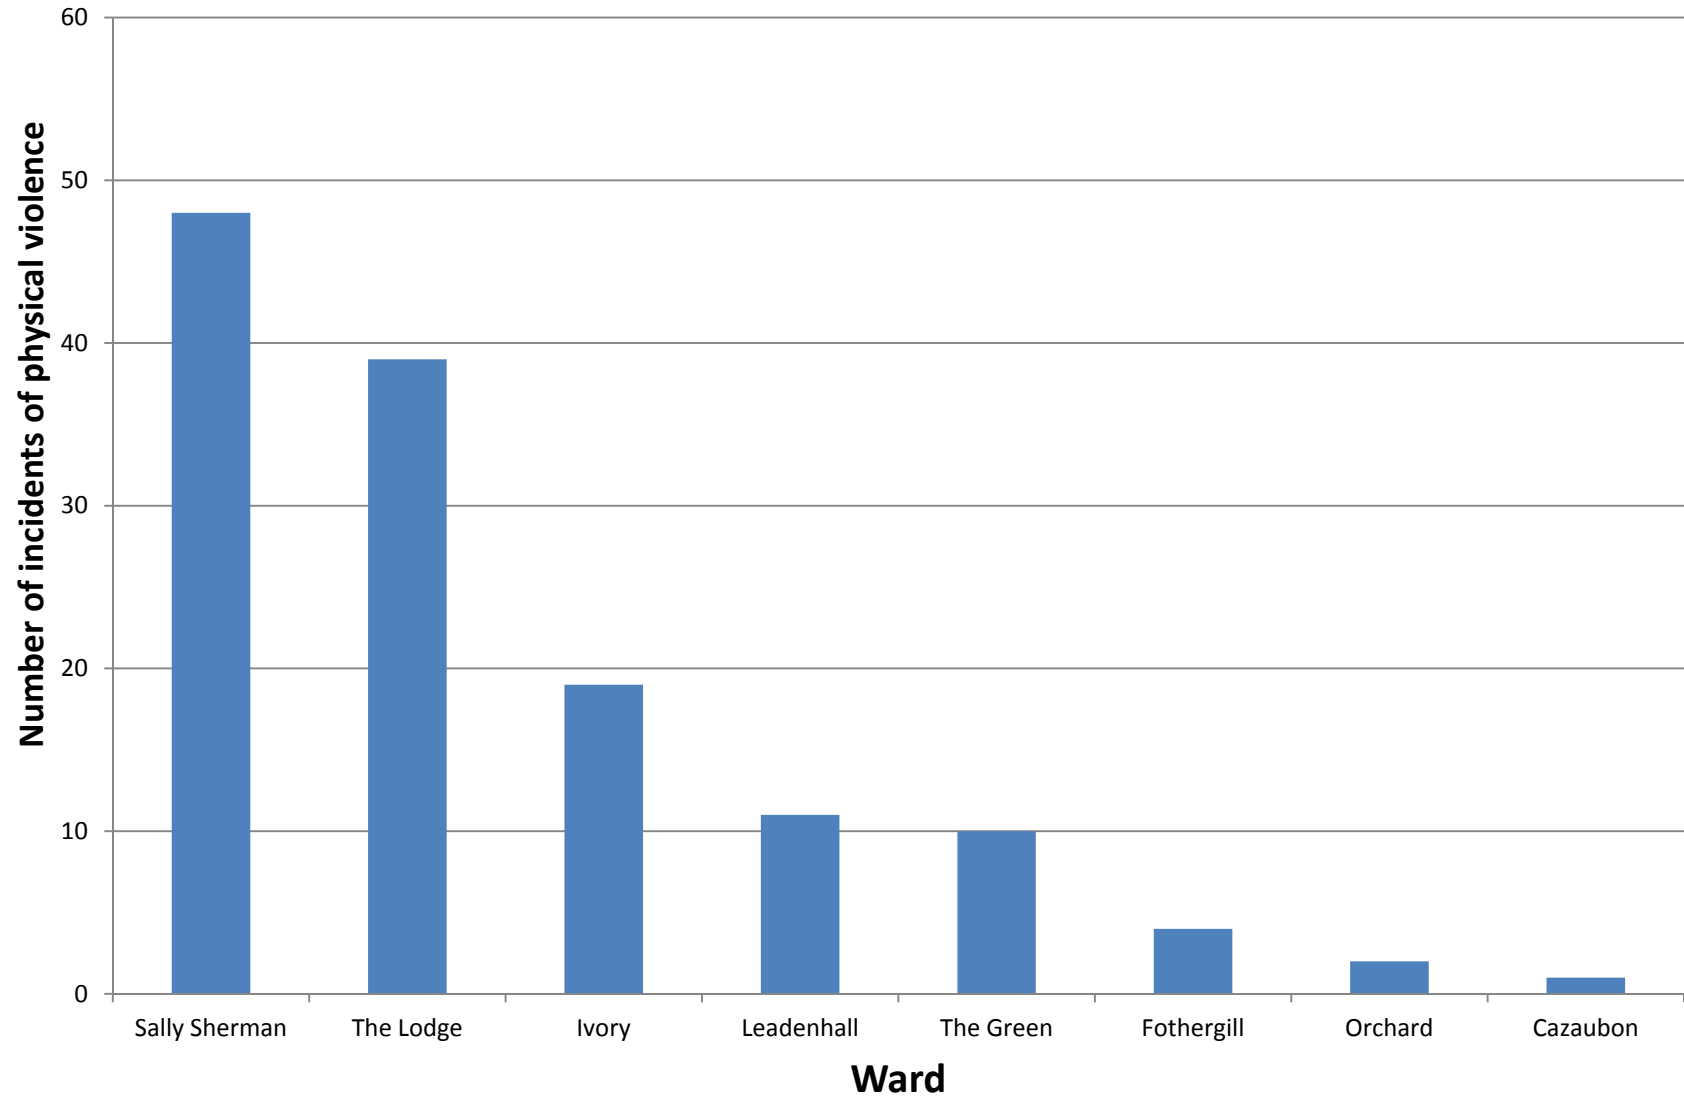

# Days between incidents of physical violence across the 3 wards – T chart

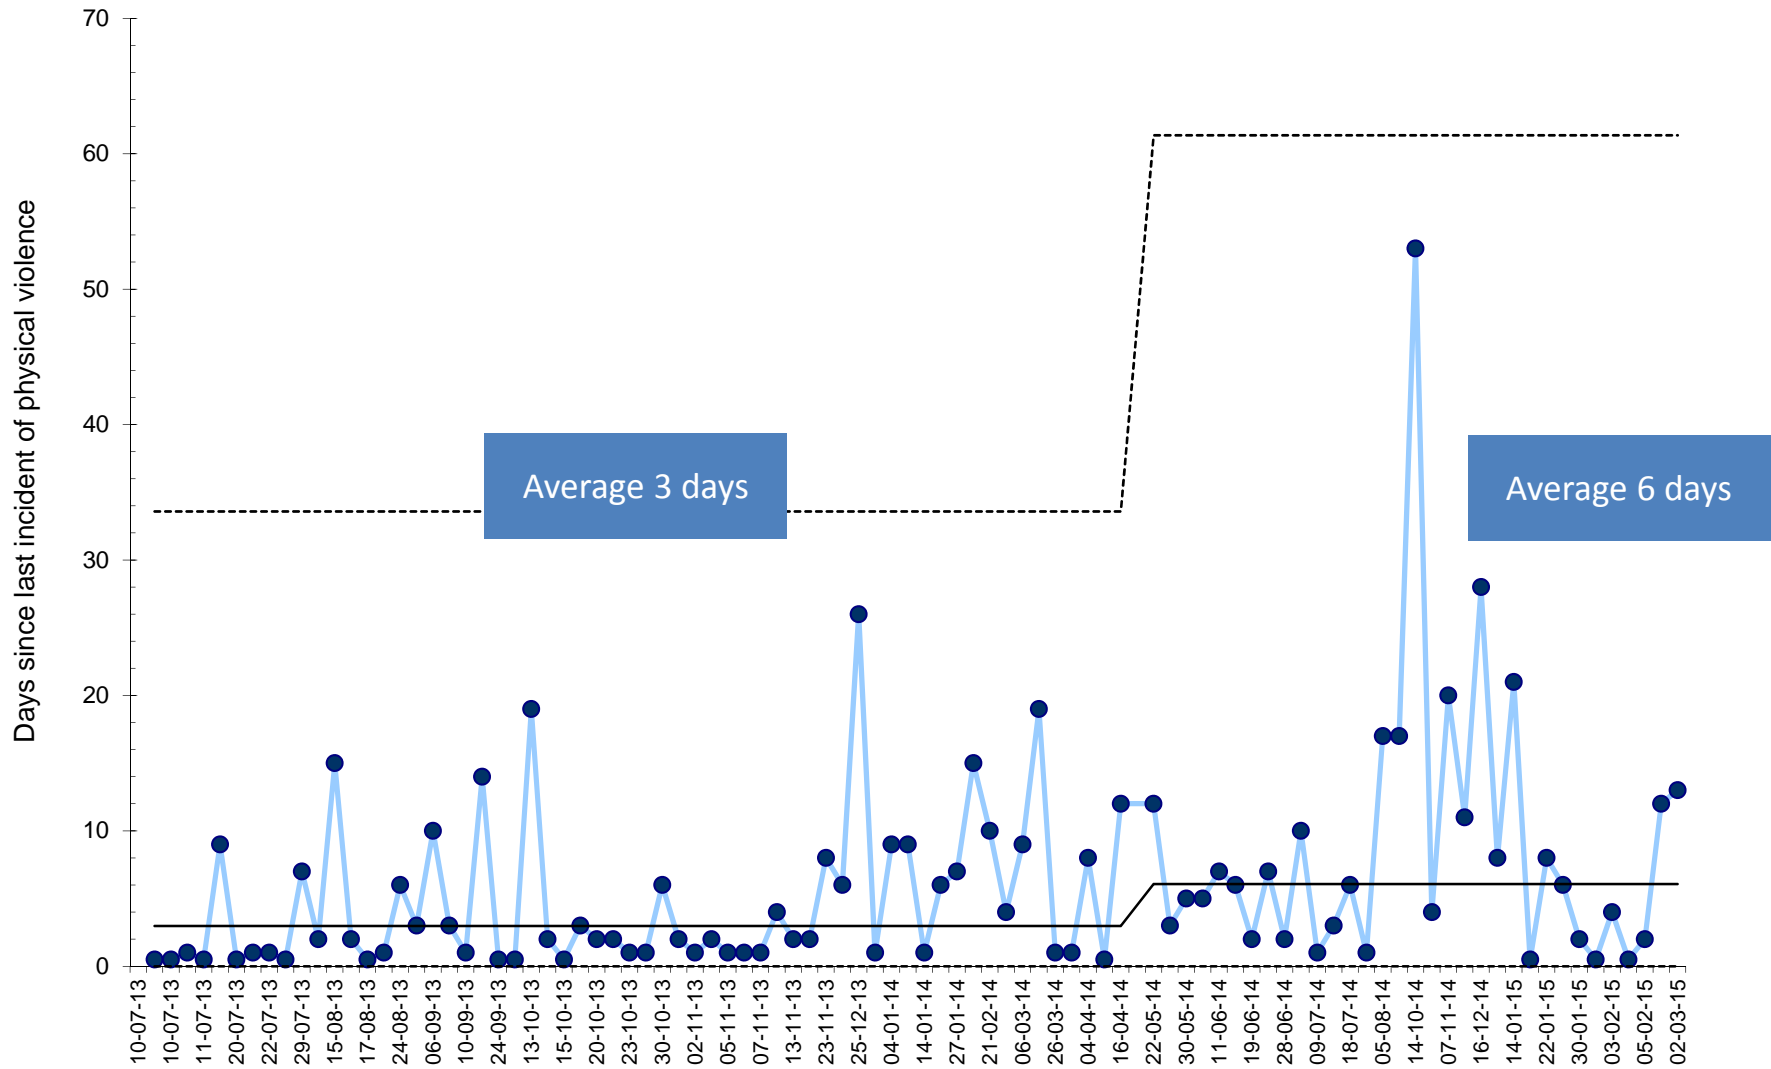

Supplement: bmjqir-4-u207447-w2977-s1.pdf [file bmjqir-4-u207447-w2977-s1.pdf]
